# Supplementary material
Source: PubMed Central journal article supplement (PMC8154675)
Supplement: NIHMS1686094-supplement-Supplementary_tables.pdf [file NIHMS1686094-supplement-Supplementary_tables.pdf]

## SUPPLEMENTAL MATERIAL

**Supplementary Table I:** Association between autonomic balance indices and risk of Alzheimer's disease

|       |                  | Model 1      |                   | Model 2      |                   | Model 3      |                   |
|-------|------------------|--------------|-------------------|--------------|-------------------|--------------|-------------------|
|       |                  | Events/<br>N | HR (95% CI)       | Events/<br>N | HR (95% CI)       | Events/<br>N | HR (95% CI)       |
| RHR   | Per<br>10<br>bpm | 94/1579      | 1.12 (0.92, 1.36) | 91/1530      | 1.05 (0.86, 1.28) | 90/1498      | 1.01 (0.82, 1.24) |
| SDNN  | Per<br>SD        | 52/815       | 0.77 (0.55, 1.07) | 51/784       | 0.81 (0.58, 1.14) | 50/767       | 0.84 (0.60, 1.21) |
| RMSSD | Per<br>SD        | 52/815       | 0.85 (0.60, 1.21) | 51/784       | 0.86 (0.60, 1.23) | 50/767       | 0.87 (0.61, 1.25) |

RHR=Resting Heart Rate; SDNN= SD of normal-to-normal intervals; RMSSD= root mean square of successive differences

Model 1 is adjusted for age, sex, education and apoe4

Model 2 is additionally adjusted for smoking status, diabetes, SBP, antihypertensives, antiarrhythmics and cardiac glycosides

Model 3 is additionally adjusted for physical activity

Results were similar after controlling for interim CHF and interim AF and after excluding stroke cases at exam 3

Bold values denote statistical significance at the  $p \leq 0.05$  level

**Supplementary Table II:** Association between autonomic balance indices and Alzheimer's disease risk stratified by age and sex

|       | model |            | Events/N | HR (95% CI) <sup>‡</sup> | p for interaction |
|-------|-------|------------|----------|--------------------------|-------------------|
| SDNN  | 1     | Age < 60y* | 30/653   | 0.98 (0.66, 1.46)        |                   |
|       |       | Age ≥ 60y* | 22/162   | <b>0.49 (0.27, 0.90)</b> | 0.089             |
|       | 2     | Age < 60y* | 29/630   | 1.04 (0.69, 1.57)        |                   |
|       |       | Age ≥ 60y* | 22/154   | 0.57 (0.31, 1.04)        | 0.158             |
|       | 3     | Age < 60y* | 29/616   | 1.03 (0.68, 1.56)        |                   |
|       |       | Age ≥ 60y* | 21/151   | 0.65 (0.36, 1.18)        | 0.319             |
| RMSSD | 1     | Age < 60y* | 30/653   | 1.26 (0.83, 1.89)        |                   |
|       |       | Age ≥ 60y* | 22/162   | <b>0.32 (0.12, 0.84)</b> | 0.017             |
|       | 2     | Age < 60y* | 29/630   | 1.31 (0.85, 2.02)        |                   |
|       |       | Age ≥ 60y* | 22/154   | <b>0.30 (0.12, 0.80)</b> | 0.011             |
|       | 3     | Age < 60y* | 29/616   | 1.30 (0.84, 2.02)        |                   |
|       |       | Age ≥ 60y* | 21/151   | <b>0.37 (0.14, 0.95)</b> | 0.029             |
| RHR   | 1     | Females    | 66/845   | 1.18 (0.93, 1.50)        |                   |
|       |       | Males      | 28/734   | 1.02 (0.72, 1.44)        | 0.487             |
|       | 2     | Females    | 64/809   | 1.09 (0.86, 1.39)        |                   |
|       |       | Males      | 27/721   | 1.01 (0.70, 1.45)        | 0.724             |
|       | 3     | Females    | 63/790   | 1.02 (0.80, 1.31)        |                   |
|       |       | Males      | 27/708   | 1.03 (0.71, 1.51)        | 0.979             |

RHR=Resting Heart Rate; SDNN= SD of normal-to-normal intervals; RMSSD= root mean square of successive differences

Model 1 is adjusted for age, sex, education and apoe4

Model 2 is additionally adjusted for smoking status, diabetes, SBP, antihypertensives, antiarrhythmics and cardiac glycosides

Model 3 is additionally adjusted for physical activity

\*At time of ECG (exam 3)

<sup>‡</sup>values are per 10 bpm for RHR and 1SD for SDNN and RMSSD

Bold values denote statistical significance at the  $p \leq 0.05$  level
